# Supplementary material for: Plant trait response of tundra shrubs to permafrost thaw and nutrient addition
Source: Copernicus journal article supplement (doi:10.5194/bg-17-4981-2020), 2020-10-18
Supplement: Supplementary file 1 [file bg-17-4981-2020-supplement.pdf]

Supplement of Biogeosciences, 17, 4981–4998, 2020  
<https://doi.org/10.5194/bg-17-4981-2020-supplement>  
© Author(s) 2020. This work is distributed under  
the Creative Commons Attribution 4.0 License.

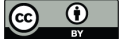

*Supplement of*

## **Plant trait response of tundra shrubs to permafrost thaw and nutrient addition**

**Maitane Iturrate-Garcia et al.**

*Correspondence to:* Maitane Iturrate-Garcia ([maitane.iturrate@gmail.com](mailto:maitane.iturrate@gmail.com))  
and Gabriela Schaepman-Strub ([gabriela.schaepman@ieu.uzh.ch](mailto:gabriela.schaepman@ieu.uzh.ch))

The copyright of individual parts of the supplement might differ from the CC BY 4.0 License.

**Table S1: Leaf trait means (standard error) for each species (*B. nana* (Betn), *S. pulchra* (Salp), *L. palustre* (Ledp), and *V. vitis-idaea* (Vacv)) and treatment combination (no cable (Ct), unheated cable (Ca), heated cable (W), no nutrient addition (NF), and nutrient addition (F)).**

|                                                | CtNF        | CaNF        | WNF         | CtF         | CaF         | WF          |
|------------------------------------------------|-------------|-------------|-------------|-------------|-------------|-------------|
| Leaf area (cm <sup>2</sup> )                   |             |             |             |             |             |             |
| Betn                                           | 0.95 (0.03) | 0.94 (0.03) | 1.04 (0.04) | 1.01 (0.03) | 1.13 (0.04) | 1.10 (0.05) |
| Salp                                           | 3.31 (0.25) | 3.36 (0.27) | 2.93 (0.23) | 4.31 (0.34) | 3.39 (0.27) | 5.00 (0.49) |
| Ledp                                           | 0.27 (0.01) | 0.24 (0.01) | 0.30 (0.02) | 0.43 (0.02) | 0.42 (0.02) | 0.45 (0.02) |
| Vacv                                           | 0.39 (0.01) | 0.38 (0.02) | 0.41 (0.02) | 0.57 (0.04) | 0.65 (0.03) | 0.66 (0.03) |
| SLA (cm <sup>2</sup> · g <sup>-1</sup> )       |             |             |             |             |             |             |
| Betn                                           | 132.0 (3.4) | 132.5 (3.8) | 135.4 (3.7) | 157.4 (5.8) | 163.8 (6.5) | 154.4 (4.8) |
| Salp                                           | 121.1 (4.8) | 121.6 (4.4) | 124.7 (4.0) | 123.2 (6.0) | 123.6 (6.6) | 129.6 (6.0) |
| Ledp                                           | 50.8 (1.7)  | 54.0 (2.0)  | 59.2 (1.8)  | 61.6 (2.2)  | 59.6 (2.7)  | 65.0 (1.5)  |
| Vacv                                           | 57.9 (2.6)  | 59.4 (2.0)  | 61.2 (3.1)  | 78.9 (3.5)  | 78.6 (3.2)  | 83.9 (3.1)  |
| LNC (%)                                        |             |             |             |             |             |             |
| Betn                                           | 24.3 (0.6)  | 23.7 (1.0)  | 24.6 (0.8)  | 32.4 (1.3)  | 34.6 (0.9)  | 31.6 (2.0)  |
| Salp                                           | 18.0 (0.9)  | 15.3 (0.8)  | 16.5 (1.1)  | 22.7 (0.8)  | 21.4 (1.4)  | 22.9 (1.5)  |
| Ledp                                           | 13.2 (0.3)  | 14.0 (0.5)  | 16.0 (1.5)  | 17.9 (0.7)  | 19.0 (0.8)  | 17.8 (0.6)  |
| Vacv                                           | 7.3 (0.4)   | 7.7 (0.4)   | 8.4 (0.4)   | 9.9 (0.5)   | 11.0 (1.0)  | 12.1 (1.4)  |
| LPC (mg · g <sup>-1</sup> )                    |             |             |             |             |             |             |
| Betn                                           | 2.08 (0.13) | 1.97 (0.16) | 2.09 (0.15) | 3.82 (0.32) | 3.92 (0.27) | 3.97 (0.38) |
| Salp                                           | 1.48 (0.07) | 1.33 (0.13) | 1.89 (0.30) | 1.55 (0.18) | 1.30 (0.14) | 1.74 (0.19) |
| Ledp                                           | 0.88 (0.03) | 1.03 (0.06) | 1.16 (0.13) | 1.26 (0.08) | 1.27 (0.07) | 1.42 (0.12) |
| Vacv                                           | 0.53 (0.03) | 0.56 (0.03) | 0.68 (0.07) | 0.78 (0.06) | 0.80 (0.10) | 0.82 (0.06) |
| Leaf dry matter content (g · g <sup>-1</sup> ) |             |             |             |             |             |             |
| Betn                                           | 0.55 (0.02) | 0.55 (0.02) | 0.54 (0.03) | 0.47 (0.03) | 0.42 (0.02) | 0.46 (0.02) |
| Salp                                           | 0.55 (0.03) | 0.48 (0.02) | 0.48 (0.01) | 0.44 (0.06) | 0.46 (0.12) | 0.43 (0.11) |
| Ledp                                           | 0.55 (0.01) | 0.54 (0.01) | 0.52 (0.01) | 0.49 (0.05) | 0.48 (0.06) | 0.47 (0.03) |
| Vacv                                           | 0.53 (0.03) | 0.53 (0.01) | 0.53 (0.01) | 0.48 (0.07) | 0.50 (0.03) | 0.44 (0.06) |
| Leaf C:N                                       |             |             |             |             |             |             |
| Betn                                           | 20.6 (0.5)  | 21.7 (1.1)  | 20.5 (0.6)  | 15.9 (1.0)  | 14.4 (0.3)  | 17.0 (1.5)  |
| Salp                                           | 27.0 (1.2)  | 32.2 (2.4)  | 27.8 (3.2)  | 21.6 (0.8)  | 23.2 (1.7)  | 23.2 (1.8)  |
| Ledp                                           | 40.5 (1.0)  | 38.4 (1.5)  | 35.3 (1.7)  | 30.2 (1.0)  | 27.9 (1.3)  | 28.8 (1.2)  |
| Vacv                                           | 70.3 (3.2)  | 67.6 (3.3)  | 62.0 (3.1)  | 53.2 (3.1)  | 50.0 (3.9)  | 46.1 (3.3)  |

**Table S2: Plant traits of each plant functional type (PFT): deciduous (Dec) and evergreen (Eve). Treatment columns show the average and standard error of the plant traits on plots unfertilized (NFert) and fertilized (Fert). LMM (linear mixed-effect model) columns show the Wald test outputs for differences of fertilization effects with PFT (Fert × PFT). Significant effects are in bold (\*\* $P < 0.001$ , \*\*  $P < 0.01$  and \*  $P < 0.05$ ).**

|                                                         | Treatment     |             | LMM               |
|---------------------------------------------------------|---------------|-------------|-------------------|
|                                                         | Fertilization |             | Fert × PFT        |
|                                                         | NFert         | Fert        | F <sub>1,26</sub> |
| Leaf area (cm <sup>2</sup> )                            |               |             | <b>16.6</b> ***   |
| Dec                                                     | 1.60 (0.10)   | 2.04 (0.15) |                   |
| Eve                                                     | 0.33 (0.01)   | 0.53 (0.01) |                   |
| Specific leaf area (cm <sup>2</sup> · g <sup>-1</sup> ) |               |             | 1.0               |
| Dec                                                     | 130.3 (1.7)   | 148.5 (2.8) |                   |
| Eve                                                     | 57.1 (0.9)    | 71.3 (1.3)  |                   |
| Leaf nitrogen concentration (%)                         |               |             | <b>12.2</b> **    |
| Dec                                                     | 21.0 (0.6)    | 28.1 (0.8)  |                   |
| Eve                                                     | 11.1 (0.5)    | 14.6 (0.5)  |                   |
| Leaf phosphorus concentration (mg · g <sup>-1</sup> )   |               |             | <b>9.4</b> **     |
| Dec                                                     | 1.84 (0.07)   | 2.84 (0.17) |                   |
| Eve                                                     | 0.81 (0.04)   | 1.07 (0.04) |                   |
| Leaf dry matter content (g · g <sup>-1</sup> )          |               |             | 1.0               |
| Dec                                                     | 0.53 (0.01)   | 0.45 (0.01) |                   |
| Eve                                                     | 0.53 (0.00)   | 0.58 (0.01) |                   |
| Leaf carbon to nitrogen ratio                           |               |             | <b>10.2</b> **    |
| Dec                                                     | 24.4 (0.8)    | 18.9 (0.6)  |                   |
| Eve                                                     | 52.3 (1.8)    | 39.5 (1.5)  |                   |
| Bark thickness (mm)                                     |               |             | 1.0               |
| Dec                                                     | 0.73 (0.03)   | 0.74 (0.03) |                   |
| Eve                                                     | 0.16 (0.00)   | 0.15 (0.00) |                   |
| Xylem diameter (mm)                                     |               |             | 0.7               |
| Dec                                                     | 4.22 (0.15)   | 4.54 (0.15) |                   |
| Eve                                                     | 1.84 (0.10)   | 1.84 (0.10) |                   |
| Stem-specific density (g · cm <sup>-3</sup> )           |               |             | 2.9               |
| Dec                                                     | 0.82 (0.02)   | 0.73 (0.02) |                   |
| Eve                                                     | 0.78 (0.03)   | 0.76 (0.03) |                   |
| Stem water content (%)                                  |               |             | <b>11.1</b> **    |
| Dec                                                     | 35.1 (1.4)    | 49.3 (2.1)  |                   |
| Eve                                                     | 35.9 (1.8)    | 38.1 (1.8)  |                   |
| Height (cm)                                             |               |             | 0.1               |
| Dec                                                     | 14.1 (0.4)    | 19.8 (0.5)  |                   |
| Eve                                                     | 7.6 (0.3)     | 10.1 (0.4)  |                   |

**Table S3: Variation percentage explained by the two principal component axes (PC1, PC2) when the trait leaf nutrient content is included (with LNC) or excluded (without LNC) from the Principal Component Analysis for each species (*B. nana* (Betn), *S. pulchra* (Salp), *L. palustre* (Ledp) and *V. vitis-idaea* (Vacv)) and for all the species together.**

|             | PC1 % variation explained |             | PC2 % variation explained |             | % explained by PC1 and PC2 |             |
|-------------|---------------------------|-------------|---------------------------|-------------|----------------------------|-------------|
|             | With LNC                  | Without LNC | With LNC                  | Without LNC | With LNC                   | Without LNC |
| Betn        | 54 %                      | 46 %        | 20 %                      | 24 %        | 74 %                       | 70 %        |
| Salp        | 41 %                      | 36 %        | 20 %                      | 25 %        | 61 %                       | 61 %        |
| Ledp        | 65 %                      | 61 %        | 17 %                      | 20 %        | 82 %                       | 81 %        |
| Vacv        | 60 %                      | 58 %        | 18 %                      | 20 %        | 78 %                       | 78 %        |
| All species | 64 %                      | 58%         | 19 %                      | 24%         | 83 %                       | 82%         |

20

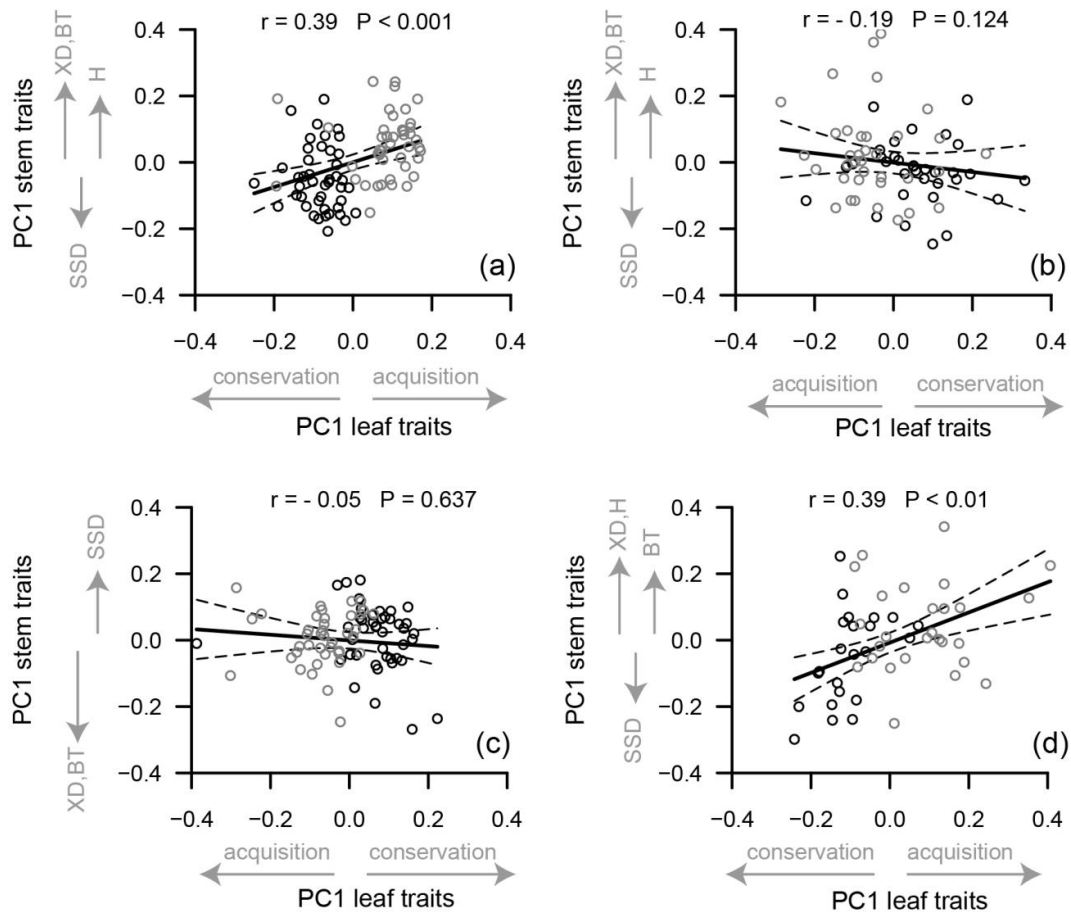

25

30

35

**Figure S1: Relationship between the first axis (PC1) of the stem traits-plant height PCA and PC1 of the leaf traits PCA for *Betula nana* (a), *Salix pulchra* (b), *Ledum palustre* (c) and *Vaccinium vitis-idaea* (d). Points are trait values for individuals on unfertilized plots (black) and on fertilized plots (grey). Solid lines are values predicted by the linear mixed-effect model and dashed lines are the upper and lower limits of the predicted value confidence interval. Pearson's correlation coefficient (r) and p-value (P) are indicated on each panel. The main traits comprising PC1 are indicated by the grey arrows. The stem traits are plant height (H), xylem diameter (XD), bark thickness (BT), and stem-specific density (SSD). Leaf traits are grouped into acquisition traits (higher SLA, LNC and LPC) and conservation traits (higher LDMC and leaf C:N).**

40
